# Supplementary material for: Whole exome sequencing of ENU-induced thrombosis modifier mutations in the mouse
Source: PubMed Central journal article supplement (PMC6143275; doi:10.1371/journal.pgen.1007658), 2018-09-06

A

Segregation for *Pyhin1* in Pedigree 13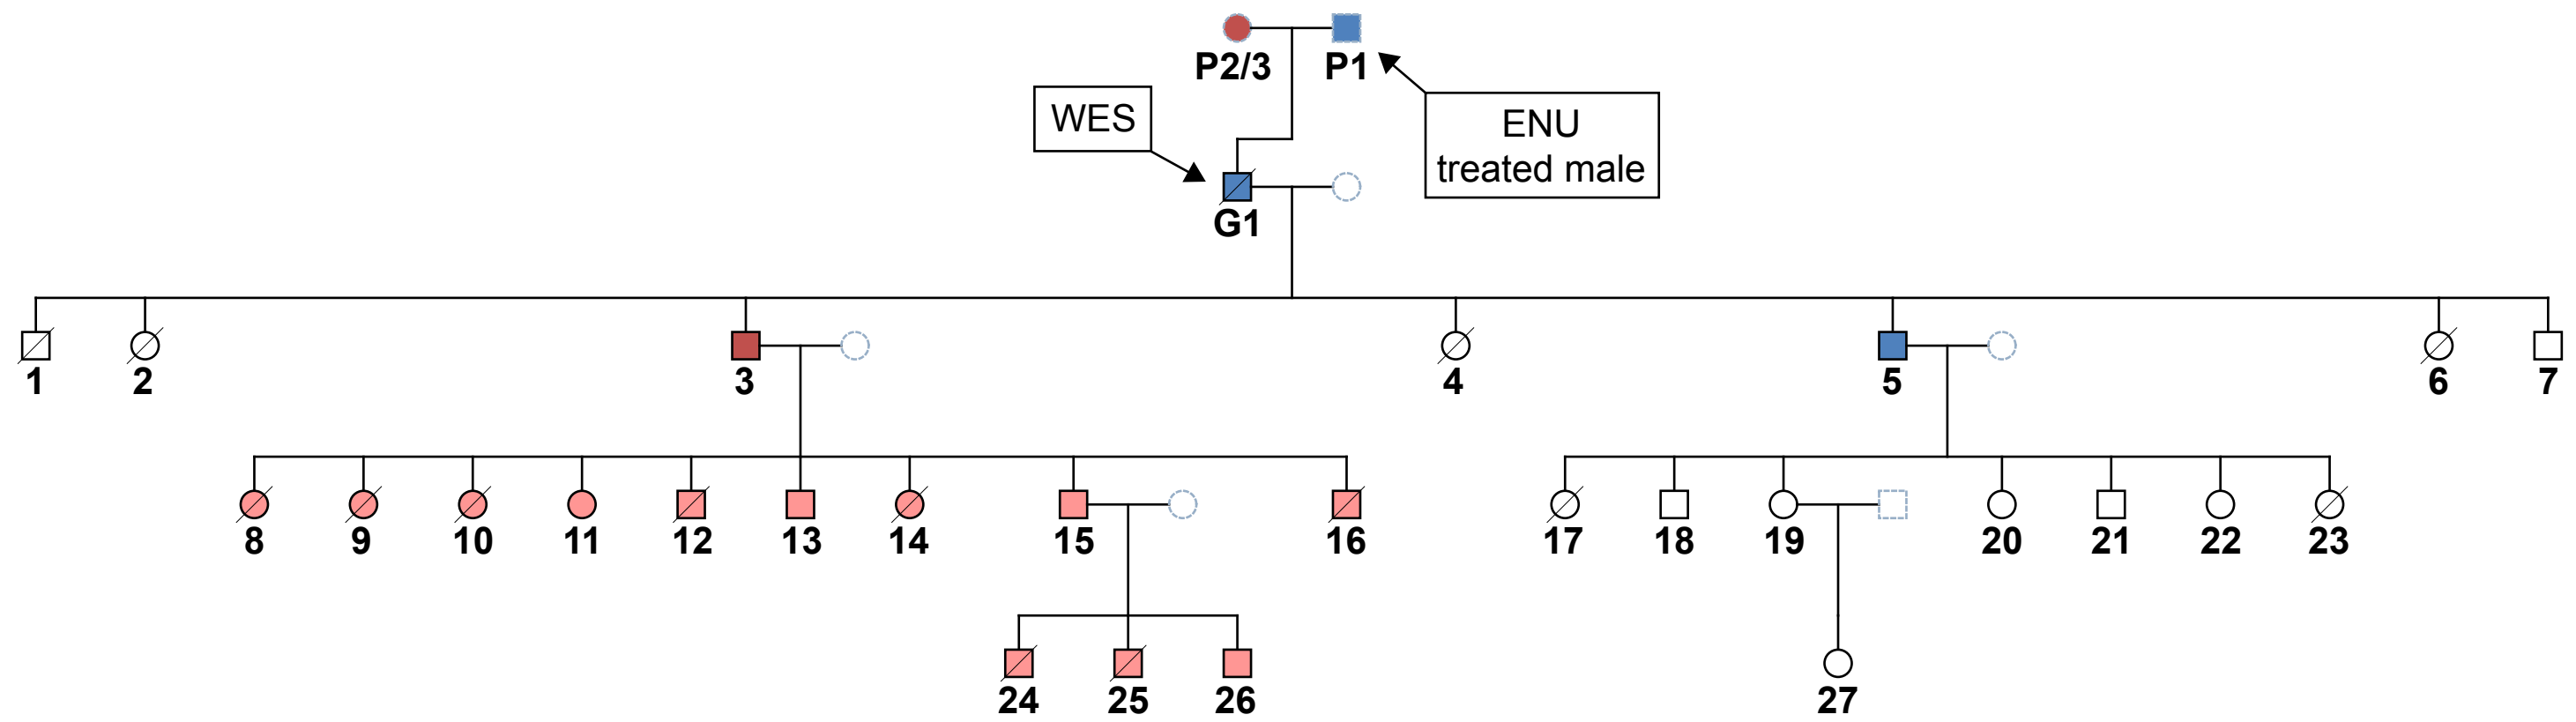

B

Segregation for *Figl2* in Pedigree 13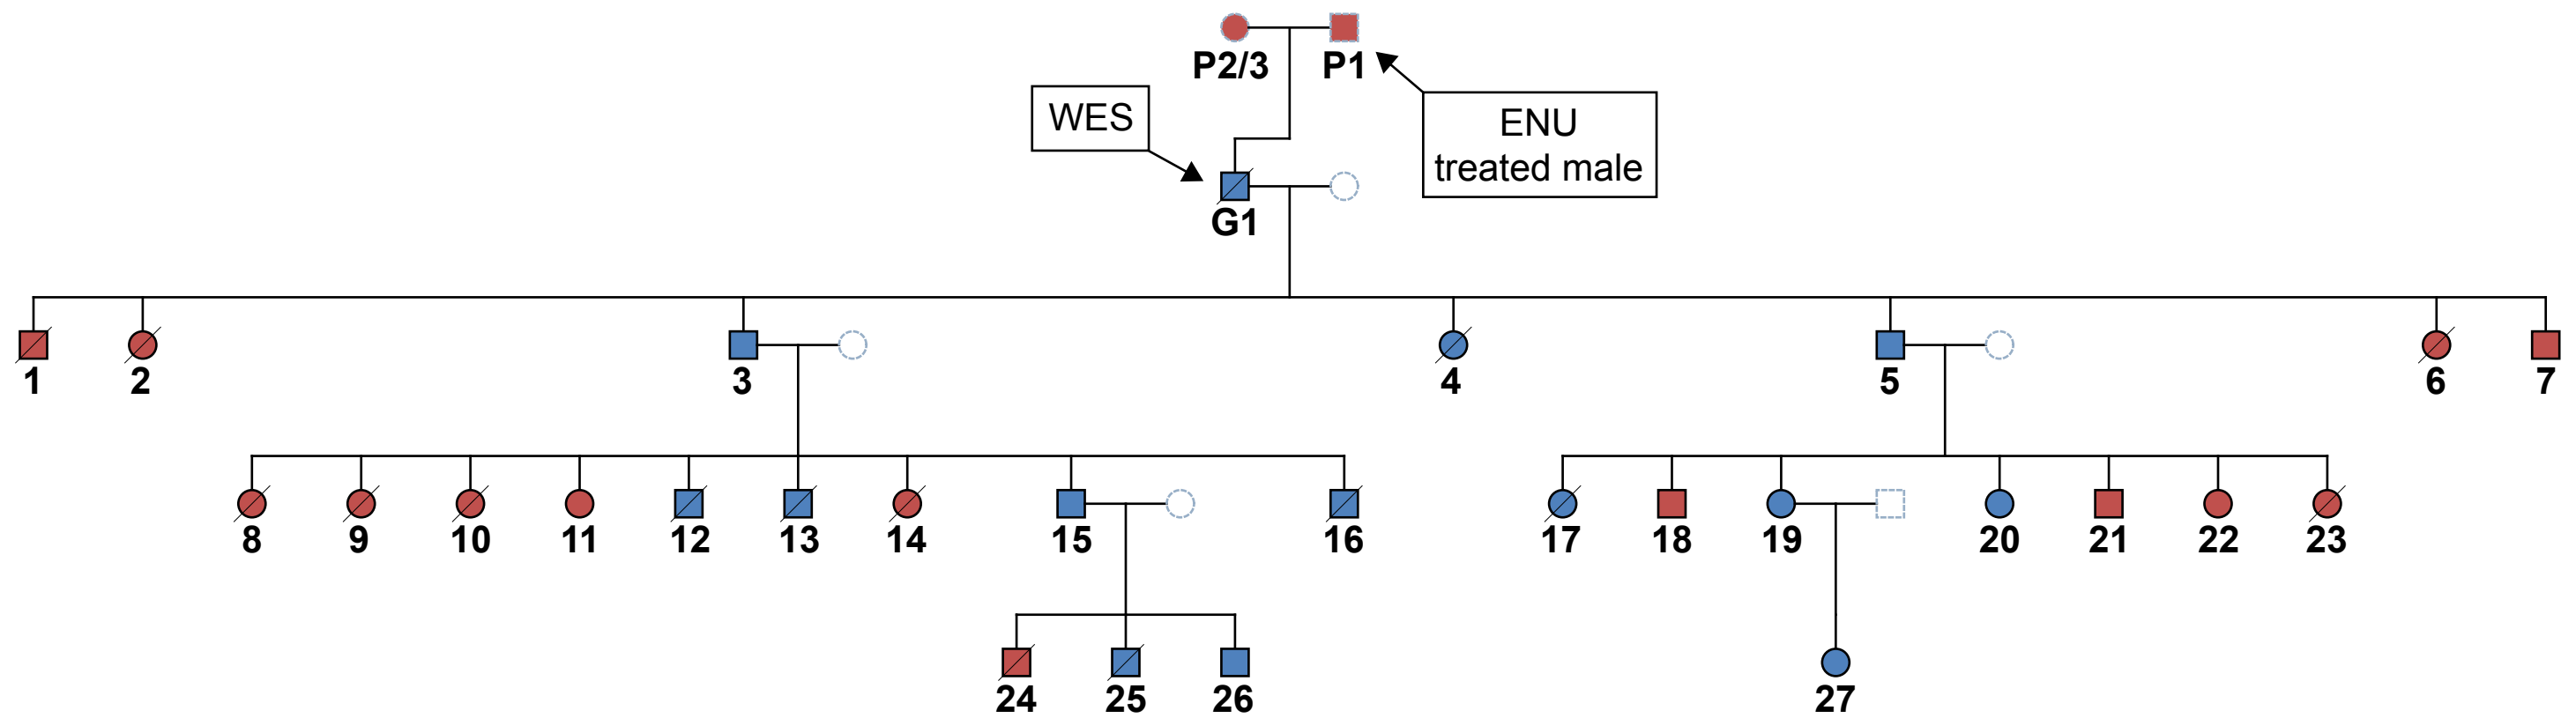

Supplement: pgen.1007658.s006.pdf [file pgen.1007658.s006.pdf]
